# Supplementary material for: Synergic action of microRNAs and Wnts delivered by motor neuron EVs in promoting AChR clustering
Source: Research Square preprint supplement (doi:10.21203/rs.3.rs-4882209/v1), 2024-09-19
Supplement: Supplementary file 1 [file 864b459142b47e1556fba6a9.docx]

**Table S3.** Antibodies used for western blot analyses. Dilutions used in the experiments and company information.

| Antibodies | Reference | Company | Dilution |
| --- | --- | --- | --- |
| CD9 | #98327S | Cell Signaling Technology | 1:1000 |
| GSK3aβ | #5676 | Cell Signaling Technology | 1:2000 |
| pGSK3aβ (Ser21/9) | #8566 | Cell Signaling Technology | 1:2000 |
| SAPK/Junk | #9252 | Cell Signaling Technology | 1:1000 |
| pSAPK/Junk (Thr183/Tyr185) | #4668 | Cell Signaling Technology | 1:1000 |
| Active β-catenin | 05-665 | Millipore | 1:2000 |
| HSP-70 | AB9920 | Millipore | 1:1000 |
| ALIX | sc-53538 | Santa Cruz Biotechnology | 1:333 |
| CD81 | sc-166028 | Santa Cruz Biotechnology | 1:333 |
| Actin | SAB4200248 | Sigma | 1:2000 |
| Calnexin | C4731 | Sigma | 1:2000 |
| Tsg-101 | T5701 | Sigma | 1:1000 |
| α-Tubulin | T5168 | Sigma | 1:2000 |
| Agrin | MA1-25500 | ThermoFisher Scientific | 1:1000 |
| Wnt11 | PA5-21712 | ThermoFisher Scientific | 1:1000 |
| Wnt3a | PA5-44946 | ThermoFisher Scientific | 1:2000 |
| Wnt4 | MA5-24376 | ThermoFisher Scientific | 1:1000 |
| HRP-coniugated anti-rat IgG | 31470 | ThermoFisher Scientific | 1:5000 |
| HRP-coniugated anti-mouse IgG | 115-035-062 | Jackson ImmunoResearch | 1:2000 |
| HRP-coniugated anti-rabbit IgG | 170-6515 | Bio-Rad | 1:5000 |
