# Supplementary material for: Synergic action of microRNAs and Wnts delivered by motor neuron EVs in promoting AChR clustering
Source: Research Square preprint supplement (doi:10.21203/rs.3.rs-4882209/v1), 2024-09-19
Supplement: Supplementary file 2 [file 32e32cec74c06a0fdc90e1f5.xlsx]

## Sheet: Normalized data
miRNAs expressed in at least 1 sample (n=353)
FeatureID	[ Diff-T2 sEV, Sample7, 7A](normalized)	[ Diff-T2 sEV, Sample7, 7B](normalized)	[ Diff-T2 sEV, Sample7, 7C](normalized)	[Diff-T5 sEV, Sample8, 8A](normalized)	[Diff-T5 sEV, Sample8, 8B](normalized)	[Diff-T5 sEV, Sample8, 8C](normalized)	[ Diff-T2 lEV, Sample5, 5A](normalized)	[ Diff-T2 lEV, Sample5, 5B](normalized)	[ Diff-T2 lEV, Sample5, 5C](normalized)	[Diff-T5 lEV, Sample6, 6A](normalized)	[Diff-T5 lEV, Sample6, 6B](normalized)	[Diff-T5 lEV, Sample6, 6C](normalized)
mmu-miR-10b-5p	9.65974	9.8015	10.3705	9.91375	9.56944	9.97833	10.6512	9.86003	10.8172	11.9648	11.4905	10.8521		Sample 5: NSC34 Diff-T2 lEVs
mmu-miR-1188-3p	0.308802	0	0	0	0.794653	0	0	0	0	0	0	0		Sample 6: NSC34 Diff-T5 lEVs
mmu-miR-1188-5p	0	0	0	0	0	0	0	0	0	0	0	0		Sample 7: NSC34 Diff-T2 sEVs
mmu-miR-1191b-5p	0	0	0.956917	1.97319	0	0	1.38966	0	1.63606	2.19664	2.04281	0.486174		Sample 8: NSC34 Diff-T5 sEVs
mmu-miR-1192	0	0.674794	0	0.388229	0	0	0	0	0	0	0	0
mmu-miR-1199-5p	0.308802	1.67479	2.54188	0.388229	0.794653	0.512765	0	0	1.63606	1.19664	2.23545	1.90121
mmu-miR-1224-5p	1.89376	1.67479	0.956917	0.388229	0	0	0	0	0	1.19664	0.235452	0
mmu-miR-1231-5p	0	0	0	0	0	0	0	0	0	1.19664	0	0
mmu-miR-124-3p	0.308802	1.67479	0	1.38823	0.794653	0	0	0	1.63606	3.69914	2.82041	2.36064
mmu-miR-1249-3p	0	0.674794	0	1.38823	0	0	0.389658	0	0	1.61168	1.23545	2.36064
mmu-miR-1249-5p	1.3088	0	0	0	0	0	0.389658	0	0	0.611676	0	0
mmu-miR-126b-3p	3.63073	3.99672	4.54188	4.47569	3.60201	3.32012	3.63759	2.73333	4.15962	5.58896	5.55738	4.70857
mmu-miR-128-1-5p	1.89376	2.99672	0.956917	0	0.794653	0	3.19701	0.73333	2.63606	1.19664	1.55738	0.486174
mmu-miR-129-2-3p	0.308802	0	2.95692	1.38823	0	0	0	0.73333	0.636058	2.41903	0.235452	0.486174
mmu-miR-129b-3p	0	2.25976	3.27885	0.388229	0	2.09773	0.97462	1.73333	2.22102	3.07111	0.235452	1.22314
mmu-miR-130a-3p	7.32003	7.49497	7.9227	8.70564	8.05204	8.4435	7.47181	6.4748	7.37753	9.40284	9.16323	8.13961
mmu-miR-130b-3p	7.53762	7.86462	8.41635	8.93897	8.40198	9.07501	7.55457	6.66407	7.44984	9.67237	9.50691	8.41691
mmu-miR-134-5p	0	0	0	0	0	0	0	0	0	0	0	0
mmu-miR-135a-1-3p	0	0	0	0	0	0	0	0	0	0	0	0
mmu-miR-138-1-3p	0.308802	0.674794	3.95692	2.38823	2.37962	2.51276	3.0901	1.73333	3.22102	4.69914	3.87931	3.60165
mmu-miR-139-3p	0	0	0	0.388229	0.794653	0	0	0	0	0.611676	0	0
mmu-miR-140-3p	5.47873	5.19836	5.71181	5.67363	5.54954	6.26765	6.14454	5.05526	6.5187	7.97362	7.51622	6.82007
mmu-miR-142a-5p	0	0	0	0	0	0	0	0	0	0	0	0
mmu-miR-145a-5p	0	0	0	0	0	0	0	0	0	0	0	0
mmu-miR-149-3p	0.308802	1.67479	2.54188	0.388229	0	2.09773	2.38966	0	1.22102	0	0	0.486174
mmu-miR-150-3p	0	0	0	0	0	0	0	0	0	0	0	0
mmu-miR-150-5p	0	0	0	0	0	0	0.97462	0.73333	0.636058	1.9336	2.23545	0.486174
mmu-miR-151-5p	0	0	0	0	0	0	0	0	0	0	0	0
mmu-miR-152-3p	0	0	0	0	0.794653	0	0.389658	0	0	0.611676	0	0
mmu-miR-15b-5p	0.308802	0	0	0	0	0	0	0	0	0	0	0
mmu-miR-16-5p	5.55673	4.84472	5.20484	6.53798	5.70154	6.24069	6.06208	4.77772	6.0111	7.92456	7.70713	6.95106
mmu-miR-1668	0	0	0	0	0	0	0	0.73333	0	0	0	0
mmu-miR-17-3p	0	0	0	1.38823	0	0.512765	0.389658	0	0	2.41903	0	0
mmu-miR-181a-1-3p	0	0	0	0	0	0	0	0	0	0	0	0
mmu-miR-181c-3p	3.63073	3.67479	4.54188	4.84766	4.60201	4.2132	4.38966	3.43377	4.84551	6.25553	5.80531	5.03049
mmu-miR-181d-3p	0	0	0	0	0.794653	0	0.389658	0	0	0	0	0
mmu-miR-182-5p	5.51826	5.71919	6.20484	6.19558	5.88212	6.4435	6.47712	5.54068	6.49404	7.8878	7.56637	6.87849
mmu-miR-183-3p	0	0.674794	0	0	0	1.51276	0	0.73333	0	1.9336	0.820415	0
mmu-miR-1839-3p	0.308802	0	0	0	0	0	0	0	0	0	0.235452	0
mmu-miR-184-3p	0	0	0.956917	0	0	0	0	0	0	0	0	0
mmu-miR-185-5p	1.3088	0	0.956917	2.38823	1.79465	2.09773	2.19701	2.05526	0	3.51857	2.93589	0.901211
mmu-miR-187-5p	0	0	0	0	0	0.512765	0.389658	0	0	0	0	0
mmu-miR-1892	0	0	0	0	0	0	0	0	0	0	0	0
mmu-miR-1893	0	0	0	0	0	0.512765	0	0	0	0	0	0
mmu-miR-1894-3p	0	0	0	0	0	0	0	0	0	0	0	0
mmu-miR-1895	2.3088	1.67479	3.27885	0	2.37962	0	2.55958	2.90326	2.63606	3.19664	2.40538	2.48617
mmu-miR-1897-5p	0	0	0.956917	0	0	0	0	0	0	0	0	0
mmu-miR-1898	0	0	0	0	0	0	0	0	0	0	0	0
mmu-miR-1901	0	0	0	0	0	0	0	0	0	0	0	0
mmu-miR-1907	0	0	0	0	0	0	0	0	0.636058	0	0	0
mmu-miR-191-5p	9.29464	9.514	10.2143	10.1263	9.80028	10.1145	10.3967	9.55829	10.5822	12.0711	11.518	10.7839
mmu-miR-1929-5p	0	0	0	0	0	0	0	0	0.636058	0	0	0
mmu-miR-1932	0	0	0	0	0	0	0	0	0.636058	0	0	0
mmu-miR-1933-3p	0.308802	0	2.54188	0	0	0	0	0	0	0	0	0
mmu-miR-194-5p	1.89376	3.25976	3.27885	3.38823	1.79465	3.32012	2.84909	3.31829	4.27991	6.10353	5.40538	4.48617
mmu-miR-1943-5p	0.308802	0	0	0	0	0	0.389658	0.73333	0	1.9336	1.23545	0.901211
mmu-miR-1946a	0	0	0.956917	0.388229	0	0	0.389658	0	0	0	0	0
mmu-miR-1946b	0	0	0	0	0	0	0	0	0	0	0	0
mmu-miR-1947-5p	1.3088	2.67479	0	1.97319	0	1.51276	2.19701	1.31829	1.63606	3.19664	2.23545	0
mmu-miR-1948-3p	0	0	0	0	0	0	0	0	0	0.611676	0	0
mmu-miR-1956	0	0	0	0	0	0	0	0	0	0	0	0
mmu-miR-195a-5p	2.3088	3.84472	3.76427	3.19558	2.37962	4.09773	3.63759	0.73333	3.72352	5.61168	5.09343	4.39306
mmu-miR-1960	0	0	0	0.388229	0	0	0	0	0	0	0	0
mmu-miR-1964-5p	0	0	0	0	0	0	0	0	0	0	0	0
mmu-miR-196a-2-3p	0.308802	0	1.95692	1.38823	0	0.512765	0	0	1.22102	1.61168	0.820415	0.486174
mmu-miR-196b-3p	0	0	0	0.388229	0.794653	0	0	0	0	0.611676	0.820415	0
mmu-miR-203-3p	0.308802	1.67479	3.76427	1.97319	0.794653	1.51276	1.97462	2.31829	2.44341	4.31212	4.52085	3.07114
mmu-miR-204-3p	0.308802	0	0	0	0	0	0	0	0	0.611676	0.235452	0
mmu-miR-20a-3p	0	0	0	0	0	0	0	0	0	0	0	0
mmu-miR-210-3p	1.3088	2.25976	0	3.71016	2.79465	4.09773	1.38966	0	2.22102	4.69914	4.36473	3.36064
mmu-miR-210-5p	0	0	0	0	0	0	0	0	0	0	0.235452	0
mmu-miR-212-3p	3.89377	3.48215	4.54188	4.08867	4.11658	4.2132	3.97462	2.73333	3.44341	5.36656	5.25782	4.03049
mmu-miR-2137	8.45855	9.1424	8.54188	8.46504	9.80588	9.97015	7.71609	8.4303	8.10366	7.48204	7.29073	7.12038
mmu-miR-214-3p	2.89377	3.48215	4.86381	3.55815	4.11658	3.83469	4.0901	3.82079	3.72352	5.74096	5.18965	3.98867
mmu-miR-218-1-3p	0.308802	0	0	1.38823	0.794653	0.512765	0.97462	0	1.22102	3.19664	0.235452	0.901211
mmu-miR-218-2-3p	1.89376	0.674794	0.956917	1.38823	0	0	1.38966	0	2.22102	0.611676	2.23545	0.486174
mmu-miR-219c-5p	0	0	1.95692	0	0.794653	0	1.38966	0	2.22102	0	0.820415	1.22314
mmu-miR-21a-3p	1.3088	1.67479	3.27885	1.38823	0	0	2.19701	2.31829	1.22102	1.9336	1.55738	2.70857
mmu-miR-24-3p	4.21569	4.37523	4.65736	4.84766	3.96458	4.9722	4.38966	3.43377	5.02838	6.16626	5.593	4.83195
mmu-miR-25-5p	3.76823	2.99672	4.41635	1.38823	2.37962	0	4.14454	3.31829	3.80598	3.61168	3.14234	1.90121
mmu-miR-2861	0	0	0	0	0.794653	1.51276	0	0	0	0	0	0
mmu-miR-296-5p	4.3088	4.37523	5.04438	4.63616	3.11658	3.83469	4.47712	3.98126	5.19065	5.41903	5.18965	4.68257
mmu-miR-298-5p	7.98123	8.20618	8.91111	9.05001	8.53612	9.12379	9.04608	7.94765	9.0348	10.7978	10.3769	9.68993
mmu-miR-299a-3p	0	0	0	0.388229	0	0	0	0	0	0	0.235452	0
mmu-miR-300-3p	0	0.674794	0.956917	0	0.794653	0	0	0.73333	1.22102	0	1.23545	0
mmu-miR-3057-3p	0	0	0	0	0	0	0	0	0	0	0	0
mmu-miR-3059-3p	0	0	0	0	0	0	0	0	0	0	0	0
mmu-miR-3065-3p	0	0	0	0	0	0	0	0	0	0	0	0
mmu-miR-3065-5p	0.308802	0.674794	0.956917	2.38823	1.79465	1.51276	1.38966	0	2.44341	3.61168	3.32292	2.8081
mmu-miR-3066-3p	0	0	0	0	0	0.512765	0	0	0	0	0	0
mmu-miR-3067-3p	0	0.674794	0	0	0	0	0	0	0	0	0	0
mmu-miR-3071-3p	0	0.674794	1.95692	0	0	0	0.389658	0	0	2.61168	2.04281	0.486174
mmu-miR-3074-1-3p	0	0	0	0	0	0	0	0	0	0	0	0
mmu-miR-3075-5p	0	0	0.956917	0	0	0.512765	0	0	0	0	0	0
mmu-miR-3076-5p	0.308802	2.25976	0.956917	0.388229	0	0.512765	0	0.73333	0	0	0	0
mmu-miR-3077-5p	0	0	0	0	0.794653	0	0	0	0	0	0.235452	0
mmu-miR-3085-5p	0	0.674794	0	0	0	0	0	0	0	0	0	0
mmu-miR-3087-5p	0	0	0	0	0	0	0	0	0	0	0	0
mmu-miR-3098-5p	0	0	0	0	0.794653	0	0	0	0	0	0.235452	0
mmu-miR-3099-3p	1.89376	2.25976	3.76427	3.38823	1.79465	3.83469	1.97462	1.31829	2.80598	5.25553	4.79004	4.22314
mmu-miR-30d-5p	0	0	0	0	0	0.512765	0	0	0	0.611676	1.23545	0
mmu-miR-31-5p	1.3088	2.25976	1.95692	0	1.79465	0.512765	1.38966	2.54069	1.95799	4.19664	3.04281	2.22314
mmu-miR-3100-3p	0	0	0	0	0.794653	0	0	0	0	0	0	0
mmu-miR-3102-3p.2-3p	0	0	0	0	0	0	0	0.73333	0.636058	0	0	0
mmu-miR-3102-5p.2-5p	0	0	0	0	0	0	0	0	0	0	0.235452	0
mmu-miR-3104-5p	0	0.674794	0	0	0	0	0	0	0	0	0.820415	0
mmu-miR-320-3p	5.89377	6.10106	6.44877	6.49675	6.34924	6.32012	5.94425	4.90326	6.17522	8.01682	7.62777	6.56655
mmu-miR-322-3p	0.308802	1.67479	0.956917	0	0.794653	0	0.97462	1.31829	1.22102	1.19664	1.82041	0
mmu-miR-324-3p	0	0	0	0	0	0	0.389658	0.73333	1.63606	0	0	0
mmu-miR-326-5p	0	0	0	0	0	0	0	0	0	0	0	0
mmu-miR-328-5p	0	0	0	0	0	0	0	0	0	0	0	0
mmu-miR-329-3p	0	0	0	0	0	0	0	0	0	0	0	0
mmu-miR-330-3p	1.3088	0.674794	0.956917	1.38823	1.79465	0	1.71159	0	0	0	0.820415	0.486174
mmu-miR-335-5p	3.3088	2.99672	4.76427	5.43262	5.11658	5.46696	5.51894	4.19276	5.59025	7.9017	7.47386	6.72139
mmu-miR-339-3p	2.63073	0.674794	2.54188	1.97319	0.794653	2.09773	1.97462	0	1.95799	2.9336	3.04281	2.48617
mmu-miR-342-3p	1.89376	0.674794	2.95692	3.38823	2.79465	1.51276	3.63759	2.90326	3.63606	5.44457	4.82041	4.25876
mmu-miR-344-3p	4.39626	5.19836	5.34924	6.45432	6.04258	6.18519	4.88151	3.90326	5.12791	7.26989	6.50224	5.75919
mmu-miR-344b-3p	4.39626	5.31865	4.86381	4.91179	5.37962	4.83469	5.65644	4.82079	5.97591	7.58322	7.13027	6.34415
mmu-miR-344f-3p	0	0	0	0	0	0	0	0	0	0.611676	0.235452	0.486174
mmu-miR-346-3p	0.308802	0	0	0	0.794653	0	0	0	0	0.611676	0	0
mmu-miR-3473d	0	0	0	0	0	0	0	0	0	0	0	0
mmu-miR-3474	0	0.674794	0	0	0	0	0	0	0	0	0	0
mmu-miR-3475-5p	0	0	0	0	0	0	0	0	0	0.611676	0	0
mmu-miR-34c-3p	2.3088	0.674794	1.95692	0	2.37962	1.51276	0	0	0	2.9336	2.69488	2.07114
mmu-miR-350-3p	1.89376	0	0.956917	2.71016	1.79465	1.51276	1.38966	0.73333	0	3.7816	3.32292	2.07114
mmu-miR-351-5p	4.83236	5.37523	4.76427	1.97319	2.79465	2.51276	5.47712	4.12565	5.02838	4.9336	5.14234	3.98867
mmu-miR-3547-5p	0	0	0	0.388229	0	0	0	0	0	0	0	0
mmu-miR-3572-5p	0	0	0	0	0	0	0	0	0	0.611676	0	0
mmu-miR-362-3p	0	0	0	0	0	0.512765	0	0	0.636058	0	0.235452	0
mmu-miR-3620-3p	1.89376	0	2.54188	1.38823	4.60201	3.9722	0.389658	1.31829	0	0	1.55738	2.22314
mmu-miR-376b-3p	0	0	0	0	0	0	0	0	0	0.611676	0	0
mmu-miR-376c-3p	0	0	0	0	0	0	0	0	0	0	0	0
mmu-miR-381-3p	2.63073	1.67479	1.95692	2.38823	1.79465	0	2.19701	2.05526	3.09549	4.25553	3.32292	2.70857
mmu-miR-383-3p	0	0	0	0	0	0	0	0	0	0	0	0
mmu-miR-3960	4.00924	1.67479	1.95692	3.84766	1.79465	3.32012	3.29655	2.90326	2.80598	3.19664	3.69488	2.22314
mmu-miR-3968	0	0	0	0	0	0	0	0	0	0	0	0
mmu-miR-409-3p	1.89376	0	0	1.38823	0	2.51276	0	0	2.22102	1.61168	1.23545	1.70857
mmu-miR-409-5p	0	0.674794	0	0	0	0	0.389658	0	0.636058	0	0	0
mmu-miR-421-3p	4.55673	5.25976	5.65736	5.74578	5.04258	5.90508	6.04787	4.77772	5.97591	7.86906	7.26336	6.66276
mmu-miR-423-3p	6.16678	6.69716	7.04438	6.31897	6.28651	6.62129	6.96709	6.07318	6.95799	7.7461	7.53007	6.84958
mmu-miR-423-5p	7.03672	7.08419	7.83956	8.13642	7.1522	8.14939	8.14455	7.36996	8.01976	10.1293	9.7996	9.34104
mmu-miR-425-5p	0.308802	0.674794	0	1.38823	0.794653	0.512765	0.389658	0	0	1.9336	2.04281	0.901211
mmu-miR-463-3p	0	0	0	0	0	0.512765	0	0	0	0	0	0
mmu-miR-466g	2.3088	3.25976	0.956917	1.97319	0	2.83469	3.29655	2.05526	2.22102	4.61168	3.82041	3.6561
mmu-miR-466h-3p	0	0	0	0	0	0.512765	0	0	0	1.19664	1.55738	0
mmu-miR-466m-3p	0.308802	0.674794	0.956917	1.97319	0.794653	1.51276	2.19701	0	1.22102	1.9336	2.69488	0.901211
mmu-miR-467b-3p	0	0	0	3.97319	0.794653	0	0	0	0	0	0	0
mmu-miR-467d-5p	1.3088	2.99672	3.27885	2.97319	2.37962	2.09773	0.97462	0	0	2.7816	1.23545	1.22314
mmu-miR-467f	0.308802	0	0	0	0	0	0	0	0	0	0	0
mmu-miR-483-5p	0.308802	0	0	0	0	0	0	0	0	0.611676	0	0
mmu-miR-486a-5p	1.3088	3.25976	0.956917	0.388229	0	0	2.55958	0	0.636058	1.61168	1.82041	0
mmu-miR-497a-5p	2.3088	1.67479	0.956917	2.38823	2.37962	2.09773	1.38966	1.31829	2.22102	3.19664	3.62777	2.8081
mmu-miR-497b	0	0	0	0	0	0	0	0	0	0	0	0
mmu-miR-500-3p	0	0	0	0	0	0	0	0	0	1.61168	0.235452	0
mmu-miR-501-3p	2.3088	0.674794	4.12684	0.388229	2.79465	0	2.38966	0.73333	2.22102	4.00399	3.14234	2.36064
mmu-miR-503-5p	0	0	0	0	0	0	0	0	0	0	0	0
mmu-miR-504-3p	0.308802	0	1.95692	0	0	0	0	0	1.63606	0	0	0
mmu-miR-505-5p	0.308802	0	0	0	0	0	0	0	0	0	0	0
mmu-miR-5107-5p	0	0	0	0	0	0	0	0	0	0	0	0
mmu-miR-511-3p	0	0	0	0	0	0.512765	0	0	0	0	0	0
mmu-miR-5110	0	0	0	0	0	0	0.389658	0	0	0	0	0
mmu-miR-5112	0.308802	0	0	0	0	0	0	0	0	0	0	0
mmu-miR-5113	0	0.674794	0	0	0.794653	1.51276	0	0	0	0	0.235452	0
mmu-miR-5114	0.308802	0	0.956917	0	0.794653	0.512765	0	1.73333	1.95799	2.19664	1.55738	0.901211
mmu-miR-5122	0	0	0	0	0	0	0	0	0	0	0	0
mmu-miR-5126	6.37489	7.19836	6.0862	5.51751	8.70754	8.02056	5.81592	7.12565	5.80598	5.74096	5.53923	5.94561
mmu-miR-5128	0	0	0.956917	0.388229	0.794653	0	0.389658	0	0	0	0.235452	0
mmu-miR-5130	0.308802	0	0	0	0.794653	0	0	0	0	0	0	0.901211
mmu-miR-5131	0	1.67479	0	0	0.794653	2.09773	0	0	0	0	0	0
mmu-miR-5132-3p	0	0	0	0	0	0	0	0	0	0	0	0
mmu-miR-5133	0	0	0	1.38823	0	0	0	0	0	0	0	0.486174
mmu-miR-5135	0	0	0	0	0	0	0	0	0	0	0	0
mmu-miR-5615-3p	0	0	0	0	0	0	0	0	0	0	0	0
mmu-miR-5620-5p	0	0	0	0	0	0	0	0	0	0	0	0
mmu-miR-5621-5p	0	0	0	0	0	0.512765	0	0	0	0	0	0
mmu-miR-5627-3p	0	0	0	0	0	0	0	0	0	0	0	0
mmu-miR-5627-5p	0	0	0	0	0	0	0	0	0	0	0	0
mmu-miR-574-3p	0	0.674794	1.95692	0	0	1.51276	1.38966	1.31829	0	2.19664	1.55738	0.486174
mmu-miR-582-3p	0	0	0	0	0	0.512765	0	0	0	0	0	0.901211
mmu-miR-598-5p	0	0.674794	0	0	0.794653	0.512765	0	0	0	0	0	0
mmu-miR-6236	6.19145	7.49497	4.65736	5.78055	8.31035	8.38928	3.55958	5.86261	5.22102	5.46966	5.1181	5.68257
mmu-miR-6240	9.00229	8.67479	7.9227	10.5059	11.3202	13.3005	9.11247	9.86261	9.3876	10.4093	10.4673	10.7561
mmu-miR-6340	0	0	0	0	0	0	0	0.73333	0	0	0	0
mmu-miR-6382	0	0	0	0	0	0	0	0	0	0	0	0
mmu-miR-6385	0	0	0	0.388229	0	0	0	0	0	0	0	0
mmu-miR-6402	0	0	0	0	0	0	0	0	0	0	0	0
mmu-miR-6407	0	0	0	0	0	0	0	0	0	0	0	0
mmu-miR-6416-3p	0	0	0	0	0	0	0	0.73333	0	0	0	0
mmu-miR-6417	0	0	0	0.388229	0	0	0	0	0	0	0	0
mmu-miR-6516-3p	0	0	0	0	0	0	0	0	0	0	0	0
mmu-miR-652-3p	3.89377	3.67479	4.54188	5.24621	5.25408	4.60023	3.91322	3.82079	4.39095	5.87846	5.48338	4.68257
mmu-miR-652-5p	0.308802	0.674794	0	0	2.37962	0	0	0	0.636058	0	0	0.901211
mmu-miR-6538	8.73925	8.58168	7.75133	9.38258	11.4942	11.3401	7.38966	8.55031	7.76018	8.69116	8.58639	8.52509
mmu-miR-6540-5p	3.11616	2.67479	1.95692	2.71016	0	3.68269	2.71159	1.31829	2.95799	4.00399	2.82041	3.60165
mmu-miR-6541	0	0.674794	0	0	0	0	0	0	0	0	0	0
mmu-miR-6546-3p	0	0.674794	0	0	0	0	0	0	0	0	0	0
mmu-miR-664-5p	0.308802	0	0	1.38823	0.794653	0.512765	0	0	0	0	0	0
mmu-miR-665-3p	0	0	0.956917	0	0	0	0	0	0	0	0	0
mmu-miR-666-5p	0	0.674794	0	0	0	0	0.389658	0	0	0.611676	1.23545	0
mmu-miR-668-3p	0	0	0	0	0.794653	0.512765	0	0	0	0	0.235452	0.901211
mmu-miR-669a-3p	3.3088	2.67479	3.27885	1.97319	2.37962	3.68269	4.94425	3.82079	5.5187	5.69914	5.06834	4.7341
mmu-miR-669b-3p	0.308802	0	0.956917	0.388229	0	0	1.38966	0	0	0	0	0
mmu-miR-669c-3p	0	0.674794	0.956917	0	0.794653	0	0	0	0	0.611676	0	0
mmu-miR-669f-3p	0	0.674794	0	0	0	1.51276	1.38966	0.73333	1.63606	2.19664	2.40538	1.70857
mmu-miR-669m-3p	0	0	0	0	0	0	0	0	0	0	0	0
mmu-miR-669p-3p	0.308802	0	0.956917	0	0	0	0	0	0.636058	1.61168	0	0
mmu-miR-671-5p	2.3088	3.25976	3.54188	3.38823	0.794653	2.83469	2.38966	1.73333	2.63606	3.7816	3.62777	2.8081
mmu-miR-6715-3p	0	0.674794	0.956917	0	0	0.512765	0	0.73333	0.636058	0	0	0
mmu-miR-674-3p	0.308802	0	0.956917	0	0.794653	0	0.389658	0	0	0.611676	0.820415	0
mmu-miR-6769b-3p	0	0	0	0	0	0.512765	0	0	0	0	0	0
mmu-miR-677-3p	0.308802	0.674794	1.95692	1.97319	2.37962	1.51276	1.97462	1.31829	0.636058	0.611676	1.82041	0.486174
mmu-miR-681	0	0	0	0	0	0	0	0	0	0	0	0
mmu-miR-6896-5p	0	0	0	0	0	0	0	0	0	0.611676	0	0
mmu-miR-6897-5p	0	0	0	0	0	0	0	0	0	0	0	0
mmu-miR-6898-5p	0	0	0	0	0	0	0	0	0	0.611676	0	0
mmu-miR-690	0.308802	0	0.956917	0	0	1.51276	1.38966	2.90326	2.44341	0	2.40538	2.48617
mmu-miR-6901-5p	0	0	0	0	0	0	0	0	0	0	0	0
mmu-miR-6906-5p	0	0	0	0	0	0	0	0	0	0	0	0
mmu-miR-6907-5p	0	0	0	0	0	0	0	0	0	0	0	0
mmu-miR-6908-5p	0	0	0	0	0	0	0	0	0	0	0	0
mmu-miR-6909-5p	0.308802	0	0	0	0	0	0	0	0	0	0	0
mmu-miR-6910-5p	0.308802	0	0	0	0	0	0	0	0	0	0	0
mmu-miR-6914-5p	0	0.674794	0	0	0	0	0	0	0	0	0	0
mmu-miR-6916-5p	0	0	0	0	0	0	0	0	0	0	0	0
mmu-miR-6922-5p	0	0	0	0	0	0	0	0	0	1.61168	0	0
mmu-miR-6923-5p	0	0	0.956917	0.388229	0	0	0	0	1.22102	1.19664	0	0
mmu-miR-6925-5p	0	0	0	0	0	0	0	0	0	0	0	0
mmu-miR-6927-5p	0	0.674794	0	0	0.794653	0	0	0	0	0	0	0
mmu-miR-6929-5p	2.3088	2.25976	4.12684	2.38823	0.794653	2.83469	3.0901	2.73333	3.09549	3.9336	2.69488	2.70857
mmu-miR-6930-5p	0	0	0	0	0	0	0	0	0	0	0	0
mmu-miR-6933-5p	0	0	0	0	0	0	0	0	0	0	0	0
mmu-miR-6936-3p	0	0	0	0	3.11658	0.512765	0	0	0	0	0	0
mmu-miR-6942-5p	0.308802	0	0	0	0	0	0	0	0	0	0	0
mmu-miR-6944-5p	0.308802	0.674794	2.54188	0	1.79465	0	2.84909	1.31829	1.63606	0.611676	2.04281	0
mmu-miR-6945-5p	0	0	0	0	0	0	0	0	0	0	0	0
mmu-miR-6946-5p	0	0	0.956917	0	0	0	0	0	0	0	0	0
mmu-miR-6948-5p	0	0	0	0.388229	0	0	0	0	0	0	0	0
mmu-miR-6949-5p	0	0	0	0	0	0	0	0	0	0	0	0
mmu-miR-6953-3p	0	0	0	0	0	0	0	0	0	0	0	0
mmu-miR-6953-5p	0	0	0	0	0	0	0	0	0	0	0	0
mmu-miR-6957-5p	0.308802	0	0	0	0	0	0	0	0	0	0	0
mmu-miR-6958-5p	0	0.674794	0	0	0	0	0	0	0	0	0	0
mmu-miR-6960-3p	0.308802	0	0	0	0	0	0	0	0	0	0	0
mmu-miR-6960-5p	0	0	0.956917	0	0	0	0	0	0	0	0	0
mmu-miR-6965-5p	0	0	0	0.388229	0	0	0	0	0	0	0	0
mmu-miR-6968-5p	3.47873	2.25976	2.54188	2.97319	5.04258	4.83469	2.97462	3.19276	3.22102	3.69914	2.82041	2.36064
mmu-miR-6969-5p	0	0	0	0	0	0	0	0	0	0	0	0
mmu-miR-6970-5p	0.308802	0	0	0	0	0	0	0	0	0	0	0
mmu-miR-6972-5p	0	0.674794	0	0	0	1.51276	0	0	0	0	0	0
mmu-miR-6973b-5p	0	0	0	0	0	1.51276	0	0	0	0	0	0
mmu-miR-6974-5p	0	0	0	0	0	0	0	0	0	0	0	0
mmu-miR-6977-5p	5.3088	5.25976	5.60077	2.71016	2.37962	2.83469	5.41203	4.98126	5.3365	4.00399	3.48338	3.48617
mmu-miR-6978-5p	0	0	0	0	0	0	0	0	0	0	0	0
mmu-miR-6979-5p	0	0	0	0	0	0.512765	0	0	0	0	0	0
mmu-miR-6981-5p	0	0	0	0.388229	0.794653	1.51276	0	2.05526	1.95799	1.19664	0.820415	0.486174
mmu-miR-6982-5p	0	0	0	0	0	0	0	0	0	0	0	0
mmu-miR-6986-5p	0	0	0	0	0	0	0	0	0	0	0	0
mmu-miR-6987-5p	0	0	0	0	0	0	0	0	0	0	0	0
mmu-miR-6989-5p	0	0.674794	0	0.388229	0	0	0	0	0	0	0	0
mmu-miR-6991-5p	0	0	0.956917	0	0	0	0	0	0	0	0	0
mmu-miR-6995-5p	0	0	0	0	0	1.51276	0	0	0	0	0	0
mmu-miR-6996-5p	0	0	0	0	0	0	0	0	0	0	0	0
mmu-miR-6998-3p	0.308802	0	0	0	0	0	0	0	0	0	0	0
mmu-miR-6998-5p	0	0	0	0	0.794653	0	0	0	0	0	0	0
mmu-miR-6999-5p	0	0	0	0	0.794653	0	0	0	0	0	0	0
mmu-miR-700-3p	0	0	0.956917	1.38823	0.794653	0.512765	0	0	0	0	0.820415	0.486174
mmu-miR-7000-5p	0	0.674794	0	0	0	0	0	0	0	0	0	0
mmu-miR-7003-5p	0	0	0	0	0	0	0	0	0	0	0	0
mmu-miR-7007-5p	0	0	0	0	0	0	0	0	0	0	0	0
mmu-miR-7008-5p	0	0	0	0	0	0	0	0	0	0	0	0
mmu-miR-7011-5p	0	0.674794	0	0	0.794653	0	0.389658	0	0	0	0.235452	0
mmu-miR-7012-5p	0	0	0	0.388229	0	0	0	0	0	0	0.235452	0
mmu-miR-7016-5p	0	0	0	0	0	0	0	0	0	0	0	0
mmu-miR-7018-5p	0	0	0	0	0	0.512765	0	0	0	0	0	0
mmu-miR-702-3p	2.63073	0	0	1.97319	1.79465	3.09773	1.71159	2.05526	1.63606	3.31212	3.40538	2.48617
mmu-miR-7027-5p	0	0	0	0	0	0	0	0	0	0	0	0
mmu-miR-703	0	0	0.956917	0	0.794653	0	0.389658	0	1.22102	0.611676	0	0
mmu-miR-7032-3p	0	0	0	0	0	0	0	0	0	0	0	0
mmu-miR-7032-5p	0	0	0.956917	0.388229	0	0.512765	0.389658	0	0	1.61168	0	0
mmu-miR-7036a-5p	7.45855	8.17464	6.20484	7.65501	10.0473	9.68519	6.43405	7.85227	6.3503	6.9063	7.15432	7.26316
mmu-miR-7038-5p	0	0	0	0	0	0	0	0	0	0	0	0
mmu-miR-7040-5p	0	0	0	0.388229	0	0.512765	0	0	0	0	0	0
mmu-miR-7042-5p	0	0	0	0	0	0.512765	0	0	0	0	0	0
mmu-miR-7045-3p	0	0	0	0	0	0	0	0	0	0	0	0
mmu-miR-7045-5p	0	0	0	0	0	0	0	0	0	0	0	0
mmu-miR-7046-3p	0	0	0	0	0.794653	0	0	0	0	0	0	0
mmu-miR-7046-5p	0	0	0	0	0	0	0	0	0	0	0	0
mmu-miR-7047-5p	0	0	0	0	0	0	0	0.73333	0	0	0	0
mmu-miR-7049-5p	0	0	0	0	0	0	0	0	0	0	0	0
mmu-miR-7051-5p	0	0	0	0	0	0	0	0	0	0.611676	0	0
mmu-miR-7056-5p	0	0	0	0	0	0	0	0	0	0	0	0
mmu-miR-7058-5p	0.308802	0	0	0	0	0	0	0	0	0	0.235452	0
mmu-miR-706	2.3088	0.674794	0.956917	1.38823	0.794653	0	0	0	1.22102	0.611676	0	0
mmu-miR-7064-5p	0	0	0	0	0	0	0	0	0	0	0	0
mmu-miR-7070-5p	0.308802	0	1.95692	0	0.794653	0	0	0	1.22102	2.19664	0.820415	0.901211
mmu-miR-7071-5p	0	0	0	0.388229	0	0	0	0	0	0	0	0
mmu-miR-7072-5p	0	0	0	0	0	0	0	0	0	0	0	0
mmu-miR-7081-5p	0	0	0	0	0	0	0	0	0	0	0	0
mmu-miR-7082-5p	1.3088	0	0	0	0	0	0	0	0.636058	0.611676	1.23545	0
mmu-miR-7083-5p	0	0	0	0.388229	0	0	0	0	0	0	0	0
mmu-miR-7085-5p	0	0	0	0	0	0	0	0	0	0	0	0
mmu-miR-7086-5p	0	0	0	0	0	0	0	0	0	0	0	0
mmu-miR-7088-5p	0.308802	0	0	0	0	0	0	0	0	0	0	0
mmu-miR-709	8.70112	9.00122	9.44476	8.08867	7.62754	7.81655	9.33071	9.03254	9.2763	9.05047	8.64484	8.25215
mmu-miR-7115-3p	0	0	0	0	0	0	0	0	0	0	0	0
mmu-miR-7116-5p	0	0	0	0.388229	0	0	0	0	0	0	0	0
mmu-miR-7118-5p	0	0	0.956917	1.38823	2.37962	0.512765	0.389658	0	0	0	0	1.48617
mmu-miR-712-3p	0	0	0	0	0	0	0	0	0	0	0	0
mmu-miR-712-5p	0.308802	0.674794	0	0.388229	0	1.51276	0.97462	0	0.636058	0.611676	0.820415	0.486174
mmu-miR-714	3.3088	3.48215	3.95692	1.97319	4.60201	3.32012	2.84909	1.73333	1.63606	1.9336	1.82041	1.70857
mmu-miR-7215-3p	0	0	0	0	0.794653	0	0	0	0	0	0	0
mmu-miR-7216-5p	0	0	0	0	0	0	0.389658	0	0	0	0	0
mmu-miR-7217-3p	0	0.674794	0	0.388229	0	0	0	0	0	0	0	0
mmu-miR-7220-3p	0.308802	0	0	0	0	0	0	0	0	0	0	0
mmu-miR-7224-3p	3.3088	4.48215	4.41635	1.38823	0.794653	1.51276	5.11758	4.59131	4.95799	5.44457	4.593	3.98867
mmu-miR-7226-3p	0	0	0.956917	0	0	0	0	0	0	0	0	0
mmu-miR-7227-3p	0	0	0	0	0	0	0	0	0	0	0	0
mmu-miR-7229-3p	0	0	0	0	0	0	0	0	0	0	0	0
mmu-miR-7236-3p	0	0	0	0	0	0	0	0	0	1.61168	0	0.486174
mmu-miR-760-5p	0	0.674794	0	0	0	0.512765	0	0	0	0	0	0
mmu-miR-761	0	0	0	0	0	0	0	0	0	0	0	0
mmu-miR-762	0	0	0	0	0.794653	0	0	0	0	0	0	0
mmu-miR-7646-5p	0	0	0	0	0	0	0	0	0	0	0	0
mmu-miR-7648-3p	0	0.674794	0	0	0.794653	0	0	0	0	0	0.820415	0
mmu-miR-7650-5p	0	0	0.956917	0	0	0	0	0	0	0	0	0
mmu-miR-7651-5p	0	0	0	0	0	0	0	0	0	0	0	0
mmu-miR-7653-5p	0.308802	0	0.956917	0	0	0	0	0	0	0	0.235452	0
mmu-miR-7654-3p	0.308802	0.674794	0	0	1.79465	0	0	0	0	1.19664	0	0
mmu-miR-7658-3p	0	0	0	0	0	0	0	0	0	0	0	0
mmu-miR-7665-5p	0	0	0	0	0	0	0	0	0	0	0	0
mmu-miR-7666-3p	0	0	0	0	0.794653	0	0	0	0	0	0	0
mmu-miR-7672-5p	0	0.674794	0	0	0.794653	0.512765	0	0	0	0	0	0
mmu-miR-7674-5p	0	0	0	0	0	0	0	0	0	0	0	0
mmu-miR-7679-3p	0	0	0	0	0	0	0	0	0	0	0	0
mmu-miR-7687-5p	0	0.674794	0	0.388229	0	0.512765	0.389658	1.31829	0.636058	1.9336	0	0
mmu-miR-7689-3p	0	0	0.956917	0	0	0	0	0	0	0	0	0
mmu-miR-7b-3p	0	0	0	0	0	0	0	0	0	0	0	0
mmu-miR-8094	0.308802	0	0.956917	0	0	0.512765	0.389658	0.73333	0	0	0	0
mmu-miR-8096	0	0	0	0	0	0	0	0	0	0	0	0
mmu-miR-8100	0	0	0	0	0.794653	0	0	0	0	0.611676	0	0
mmu-miR-8101	0	0	0	0	0	0	0	0	0	0	0	0
mmu-miR-8102	0	0	0	0	0	0	0	0	0	0	0	0
mmu-miR-8105	0	0	0	0	0.794653	0	0	0	0	0	0	0
mmu-miR-8109	0.308802	0	0	1.97319	0.794653	0	3.84909	0	0	0	0	0
mmu-miR-8110	0.308802	0	0	0	0	0.512765	0	0	0	0	0	0
mmu-miR-8112	0	0	0	1.97319	0	2.51276	1.71159	0	1.95799	1.9336	2.23545	0.901211
mmu-miR-8115	0	0	1.95692	0	0	0	0	0	0	0	0	0
mmu-miR-874-3p	0	0	0	0	0	0	0	0	1.22102	0	0	0
mmu-miR-877-5p	3.76823	2.99672	3.95692	3.55815	3.37962	2.09773	4.34385	3.82079	4.59025	5.36656	4.48338	3.85541
mmu-miR-9-3p	0.308802	1.67479	0	0.388229	0	0.512765	1.38966	0	0	1.61168	1.55738	1.90121
mmu-miR-92b-5p	0.308802	0.674794	0.956917	0	0	0	0	0	0	0	0	0
mmu-miR-9768-5p	0	0	0	0	0	0	0	0	0	0	0	0
mmu-miR-99b-5p	8.76001	8.38904	9.8242	8.85175	8.67117	8.83018	9.23358	8.34066	9.34686	10.8977	10.5529	9.79527
