# Supplementary material for: Synergic action of microRNAs and Wnts delivered by motor neuron EVs in promoting AChR clustering
Source: Research Square preprint supplement (doi:10.21203/rs.3.rs-4882209/v1), 2024-09-19
Supplement: Supplementary file 2 [file d234932c5b710cda07a0c997.docx]

**Table S2.** List of primers used for qPCR.

| **Target gene** | **Sense 5’-3’** | **Antisense 5’-3’** |
| --- | --- | --- |
| Axin-1 | aacacatggtcatgccaagc | ttctcagcgtcctctgtgg |
| Axin-2 | aagagaagcgacccagtcaa | ctgcgatgcatctctctctg |
| Ctnnb1 | ttaaactcctgcacccaccat | agggcaaggtttcgaatcaa |
| CHRNA1 | tcccttcgatgagcagaact | gggcagcaggagtagaacac |
| Gapdh | caccatcttccaggagcgag | ccttctccatggtggtgaagac |
| Lrp4 | ccctgcaagtgaagatgaaa | ttcaagaactgcgattctgg |
| Lrp6 | ggtctcaccatcgactatgc | aaggatgaggcaagtcatctg |
| Rapsyn | atatcgggccatgagccagta | tcacaacactccatggcactgc |
| Rspo2 | cattgcggagtccaggagat | cactctgtctgtagcgagga |
| Vangl2 | ggagtcgtggagataaatcagtg | gacactgtcctccatgtccttg |
| Wnt1 | gggctctgggcgctgctgcc | gcaggtgcaggactcgatgg |
| Wnt3a | caccaccgtcagcaacagcc | aggagcgtgtcactgcgaaag |
| Wnt3 | caagcacaacaatgaagcaggc | tcgggactcacggtgtttctc |
| Wnt4 | cgttcgtgcctgcggtccctg | ggcgatgttgtccgagcatc |
| Wnt5a | ccattggaatattaagcccg | ctcggctcatggcgttcacc |
| Wnt7 | ccagggcaatctgagcaat | ccacaaagcgacgagaaaag |
| Wnt9a | gcagcaagtttgtcaaggagttcc | gcaggagccagacacaccatg |
| Wnt10b | gagggggctgaacccgacag | actcgtgaacggcgatgtgc |
| Wnt11 | gacaccacaccaggaggc | attccagaaagccggtcttt |
